# Supplementary material
Source: publisher figshare collection journal article supplement (https://acs.figshare.com/ndownloader/files/5333041)
Supplement: Supplementary file 1 [file 5333041]

## Supporting Information

### Cobalt Cross-Linked Redox-Responsive PEG-Hydrogels: From Viscoelastic Liquids to Elastic Solids

Seraphine V. Wegner,<sup>\*,†,‡,§</sup> Franziska C. Schenk,<sup>†,‡</sup> Sina Witzel,<sup>‡</sup> Friedrich Bialas<sup>‡</sup> and Joachim P. Spatz<sup>†,‡</sup>

<sup>†</sup> Department of New Materials and Biosystems, Max Planck Institute for Intelligent Systems, 70596 Stuttgart, Germany

<sup>‡</sup> Department of Biophysical Chemistry, University of Heidelberg, 69120 Heidelberg, Germany

<sup>§</sup> Max Planck Institute for Polymer Research, Ackermannweg 10, D-55128 Mainz, Germany.

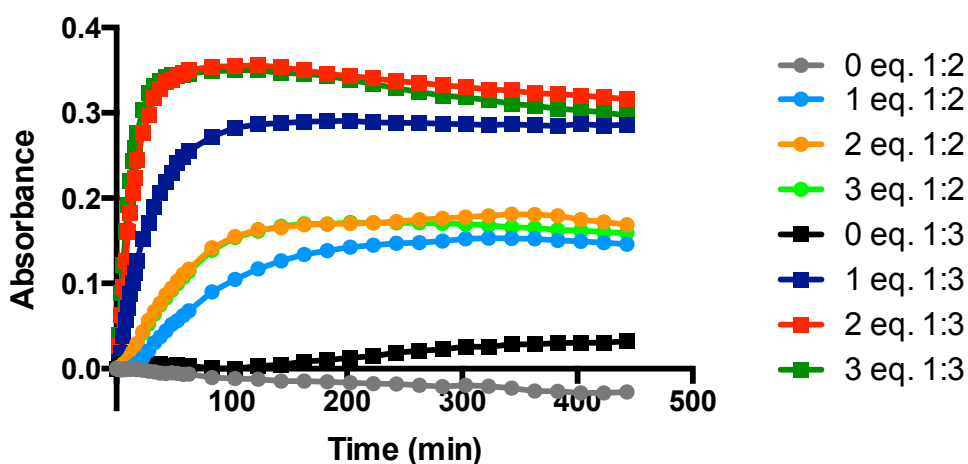

**Figure S1.** Oxidation kinetics of  $\text{Co}^{2+}$  centers to  $\text{Co}^{3+}$ . 75 mM mPEG-His and 37.5 or 25 mM  $\text{CoCl}_2$  are mixed in 100 mM HEPES buffer pH 7 to yield 1:2 or 1:3 cobalt to end-group ratios respectively. Then 0, 1, 2 or 3 eq.  $\text{H}_2\text{O}_2$  per  $\text{Co}^{2+}$  ion are added to the solutions and the absorbance at 550 nm is monitored overtime.

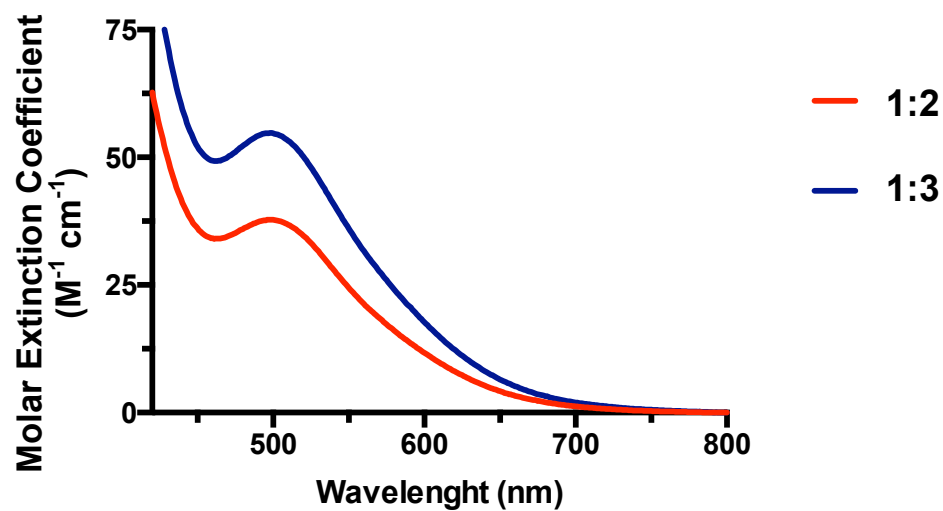

**Figure S2.** UV-Vis absorption spectrum of Co<sup>3+</sup>-mPEG complexes. 12 mM mPEG-His with 6 mM (1:2) or 4 mM (1:3) CoCl<sub>2</sub> is treated with 2 equivalents of H<sub>2</sub>O<sub>2</sub> for 2 hours before the spectra were recorded.

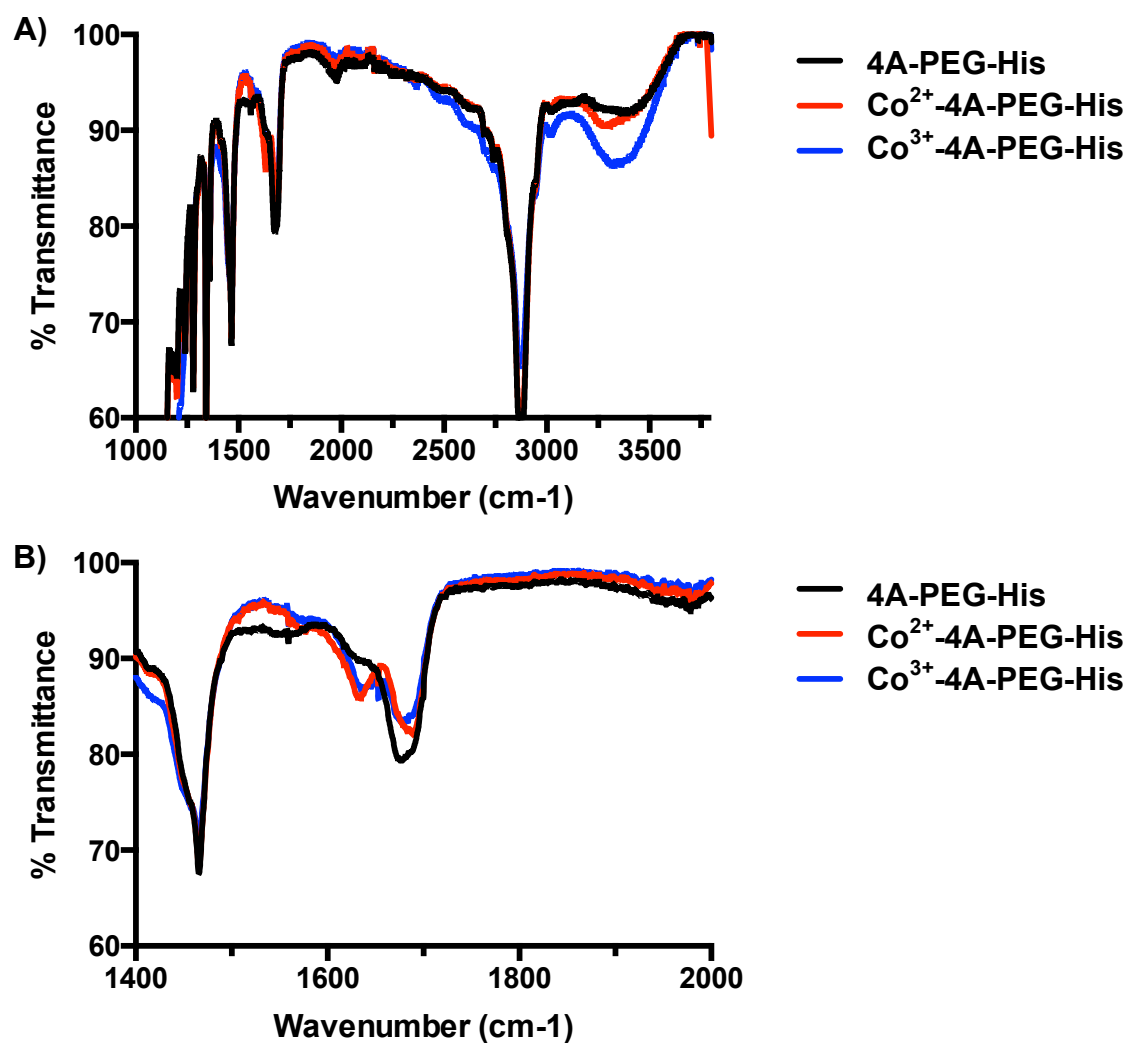

**Figure S3.** IR spectra of 4A-PEG-His,  $\text{Co}^{2+}$ -crosslinked 4A-PEG-His and  $\text{Co}^{3+}$ -crosslinked 4A-PEG-His. A) Overview and B) enlarged.

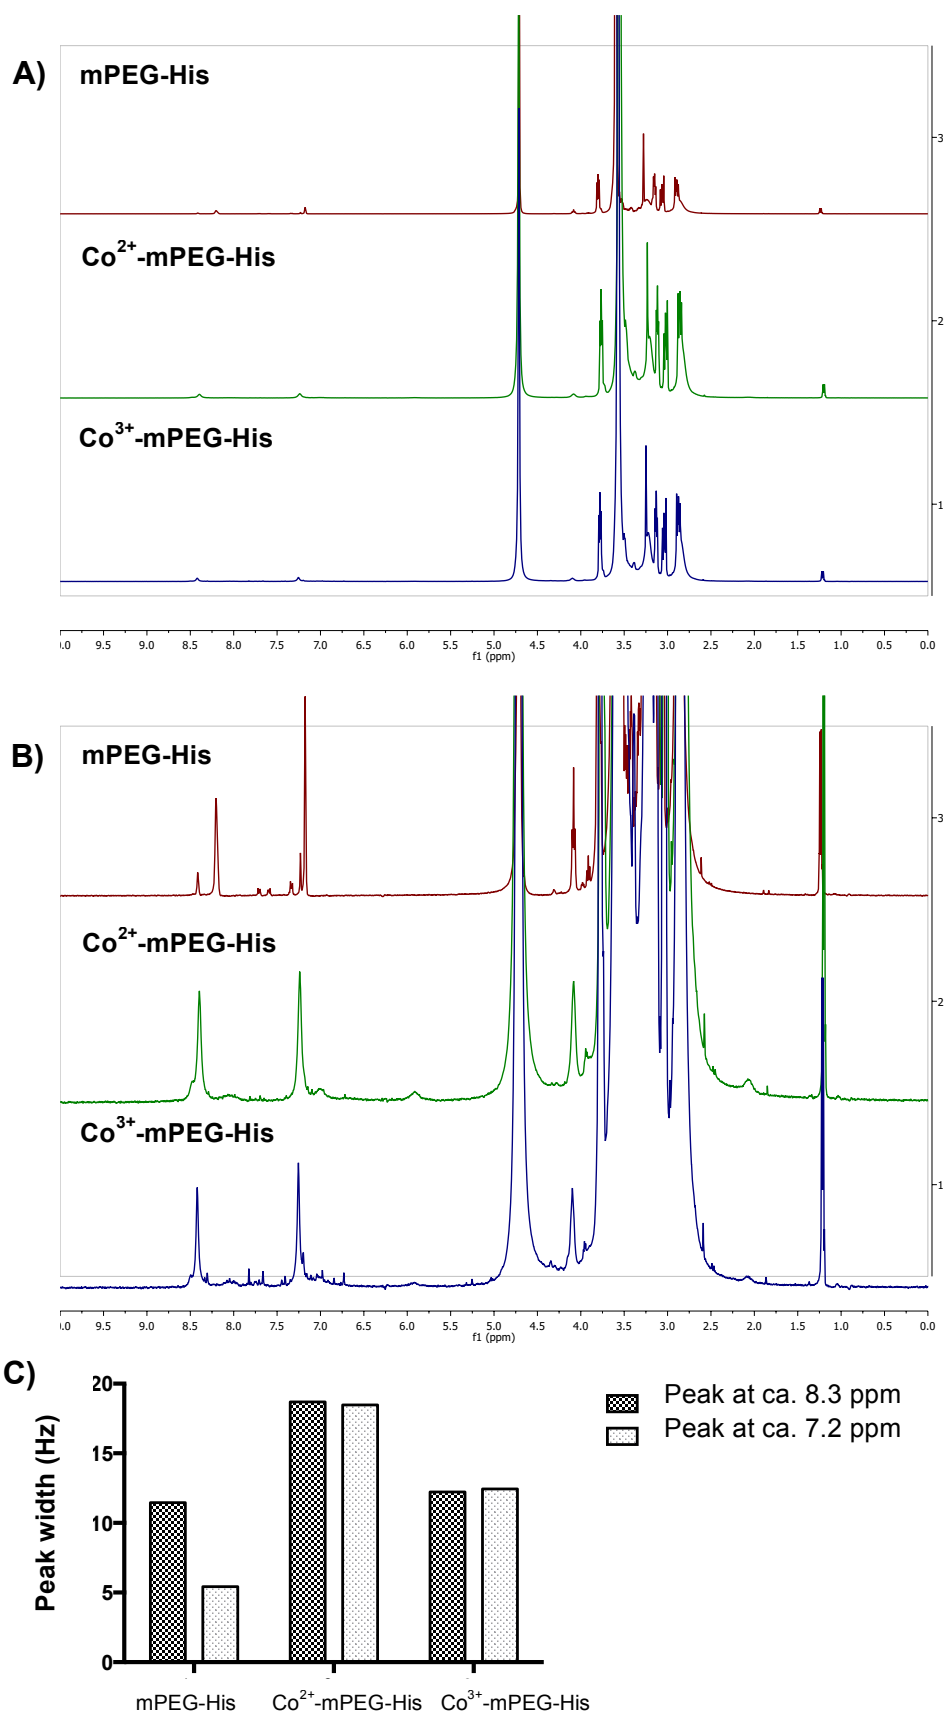

**Figure S4.** <sup>1</sup>H-NMR of mPEG, Co<sup>2+</sup>-mPEG and Co<sup>3+</sup>-mPEG. 30 mM mPEG is dissolved in D<sub>2</sub>O with 100 mM HEPES and the pH is adjusted to 7 with NaOH. 10 mM CoCl<sub>2</sub> is used to form the complexes and 30 mM H<sub>2</sub>O<sub>2</sub> are used for oxidation for 3 hours. A) Overview and B) enlarged C) Full width at half maximum of imidazole peaks.

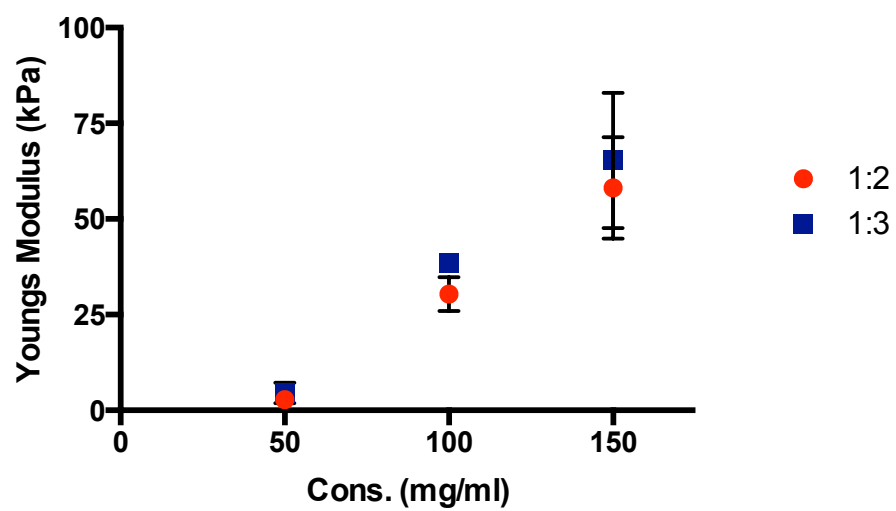

**Figure S5.** The Young's moduli of  $\text{Co}^{3+}$  cross-linked 4A-PEG-His hydrogels.

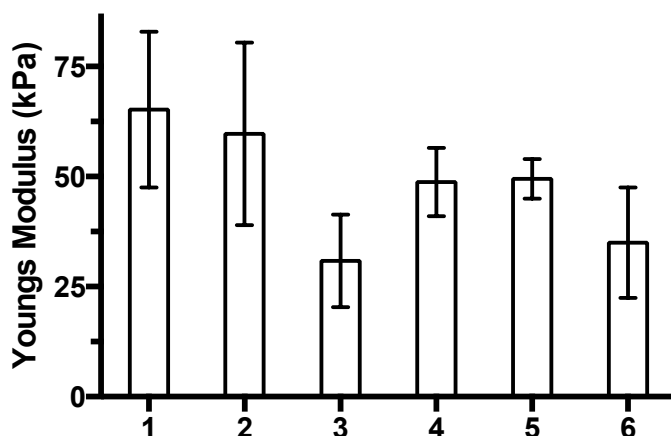

**Figure S6.** The Young's moduli of  $\text{Co}^{3+}$  cross-linked 4A-PEG-His hydrogels (150 mg/ml with a 1:3 cobalt to end-group ratio). 1) unswollen, 2) swollen for 1 day in 100 mM HEPES pH 7, 3) swollen for 2 day in 100 mM HEPES pH 7, 4) swollen for 1 day in 100 mM HEPES pH 2, 5) swollen for 1 day in 100 mM HEPES pH 10 and 6) swollen for 1 day in 50 mM EDTA, 100 mM HEPES pH 7. The values are the average of 2 independent experiments and the errors are gives as the standard deviation.
